# Supplementary material for: Evaluating manual versus automated benthic foraminiferal δ 18 O alignment techniques for developing chronostratigraphies in marine sediment records
Source: Copernicus journal article supplement (doi:10.5194/gchron-6-125-2024), 2024-04-17
Supplement: Supplementary file 1 [file gchron-6-125-2024-supplement.zip]

Archive with 3 entries (3 files):
- gchron-6-125-2024-supplement-title-page.pdf
- HMM_match_SupplementalTables.xlsx
- U1541_d18O_age_model_SUpplement_1204023.pdf
