# Supplementary material for: Evaluating manual versus automated benthic foraminiferal δ 18 O alignment techniques for developing chronostratigraphies in marine sediment records
Source: Copernicus journal article supplement (doi:10.5194/gchron-6-125-2024), 2024-04-17
Supplement: Supplementary file 1 [file gchron-6-125-2024-supplement.zip › gchron-6-125-2024-supplement-title-page.pdf]

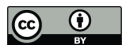

*Supplement of*

**Evaluating manual versus automated benthic foraminiferal  $\delta^{18}\text{O}$  alignment techniques for developing chronostratigraphies in marine sediment records**

**Jennifer L. Middleton et al.**

*Correspondence to:* Jennifer L. Middleton ([jennym@ldeo.columbia.edu](mailto:jennym@ldeo.columbia.edu))

- [gchron-6-125-2024-supplement-title-page.pdf](#)
- [HMM\\_match\\_SupplementalTables.xlsx](#)
- [U1541\\_d18O\\_age\\_model\\_SUpplement\\_1204023.pdf](#)

The copyright of individual parts of the supplement might differ from the article licence.
