# Supplementary material for: Evaluating manual versus automated benthic foraminiferal δ 18 O alignment techniques for developing chronostratigraphies in marine sediment records
Source: Copernicus journal article supplement (doi:10.5194/gchron-6-125-2024), 2024-04-17
Supplement: Supplementary file 1 [file gchron-6-125-2024-supplement.zip › U1541_d18O_age_model_SUpplement_1204023.pdf]

### Supplemental Figure S1.

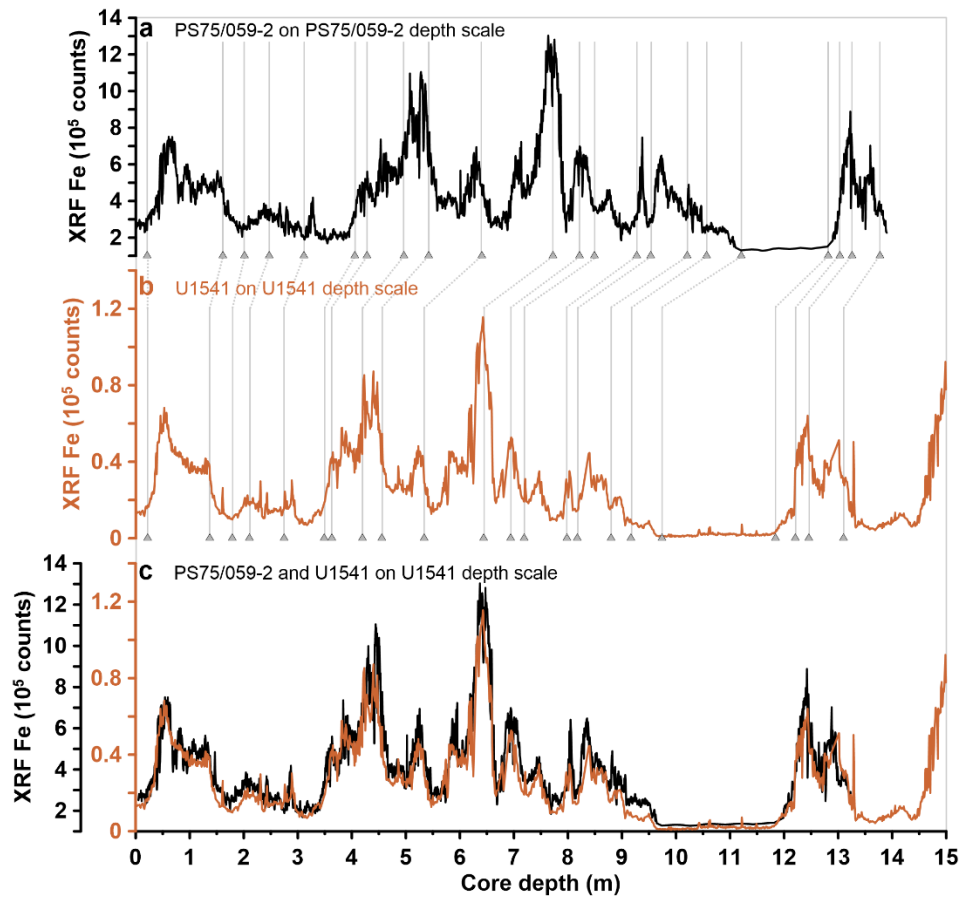

**Figure S1.** Alignment of U1541 and PS75/059-2 (grey lines) based on X-ray fluorescence (XRF) Fe data and 22 tie points (triangles). a) XRF Fe counts in core PS75/059-2 on the PS75/059-2 depth scale (Lamy et al., 2014), b) XRF Fe counts of sediments at Site U1541 on the U1541 depth scale (Winckler et al., 2021) and c) XRF Fe counts of PS75/059-2 (black) and U1541 (orange) on the U1541 depth scale.

**Supplemental Tables S1-S7 are available in the included spreadsheets.**
